# Supplementary material for: Liver Graft MicroRNAs Expression in Different Etiology of Acute Jaundice after Living Donor Liver Transplantation
Source: MDPI journal article supplement (doi:10.3390/biology11081228), 2022-08-17
Supplement: s1 [file s1]

Supplement Table S1. Receiver operating characteristic (ROC) curves for evaluation of each 4 miRNA hepatic miRNAs (miRNA-122, miRNA-301, miRNA-133a and miRNA-21) as biomarkers of different liver graft pathology.

**miRNA -122**

|    |                                                                                                                             |                                                                                                                                                                                     |
|----|-----------------------------------------------------------------------------------------------------------------------------|-------------------------------------------------------------------------------------------------------------------------------------------------------------------------------------|
| AC | 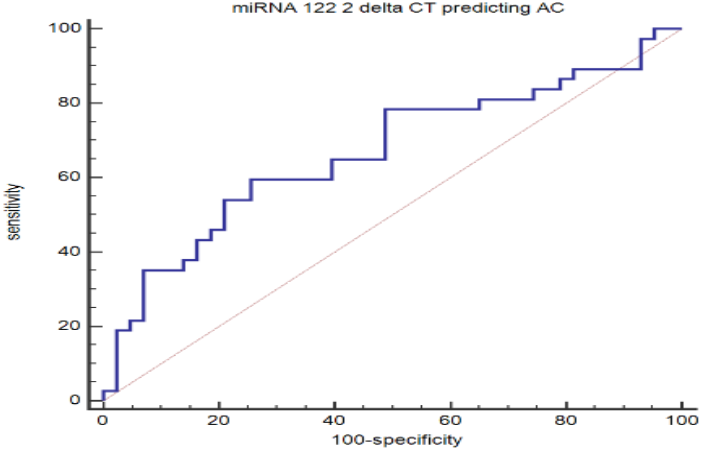 <p>miRNA 122 2 delta CT predicting AC</p> | <p>cutoff value: <math>\leq 0.5948</math><br/> AUC = 0.668<br/> P = 0.008*<br/> sensitivity = 59.46<br/> specificity = 74.42<br/> 95% CI = 0.553-0.769<br/> Youden J = 0.3388</p>   |
| AR |  <p>miRNA 122 predicting AR</p>           | <p>cutoff value: <math>&gt; 1.4337</math><br/> AUC = 0.638<br/> P = 0.0652<br/> sensitivity = 60.0<br/> specificity = 70.0<br/> 95% CI = 0.523 - 0.743<br/> Youden J = 0.3000</p>   |
| RH |  <p>miRNA 122 predicting RH</p>          | <p>cutoff value: <math>&gt; 0.2117</math><br/> AUC = 0.571<br/> P = 0.3614<br/> sensitivity = 100.0<br/> specificity = 26.47<br/> 95% CI = 0.455 - 0.681<br/> Youden J = 0.2647</p> |

|      |                                                                                                                                                |                                                                                                                                                                                                                                                                                                                                                                                               |
|------|------------------------------------------------------------------------------------------------------------------------------------------------|-----------------------------------------------------------------------------------------------------------------------------------------------------------------------------------------------------------------------------------------------------------------------------------------------------------------------------------------------------------------------------------------------|
| FC   | <p data-bbox="523 145 721 168">miRNA predicting FC</p> 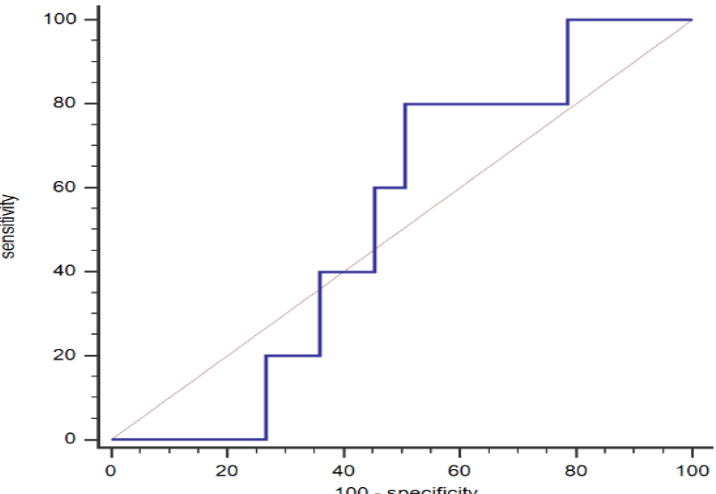       | <p data-bbox="986 112 1273 138">cutoff value: &gt; 0.8249</p> <p data-bbox="986 159 1145 185">AUC = 0.525</p> <p data-bbox="986 206 1125 232">P = 0.7985</p> <p data-bbox="986 253 1220 280">sensitivity = 80.00</p> <p data-bbox="986 300 1220 327">specificity = 49.33</p> <p data-bbox="986 347 1276 374">95% CI = 0.411 - 0.638</p> <p data-bbox="986 394 1220 421">Youden J = 0.2933</p> |
| NSPC | <p data-bbox="497 701 762 723">miRNA122 predicting NSPC</p>  | <p data-bbox="986 685 1273 712">cutoff value: &gt; 0.6268</p> <p data-bbox="986 732 1145 759">AUC = 0.574</p> <p data-bbox="986 779 1125 806">P = 0.5276</p> <p data-bbox="986 826 1220 853">sensitivity = 82.33</p> <p data-bbox="986 873 1220 900">specificity = 47.30</p> <p data-bbox="986 920 1276 947">95% CI = 0.459 - 0.684</p> <p data-bbox="986 967 1220 994">Youden J = 0.3063</p> |

## miRNA -301

|    |                                                                                     |                                                                                                                                                                                                   |
|----|-------------------------------------------------------------------------------------|---------------------------------------------------------------------------------------------------------------------------------------------------------------------------------------------------|
| AC | 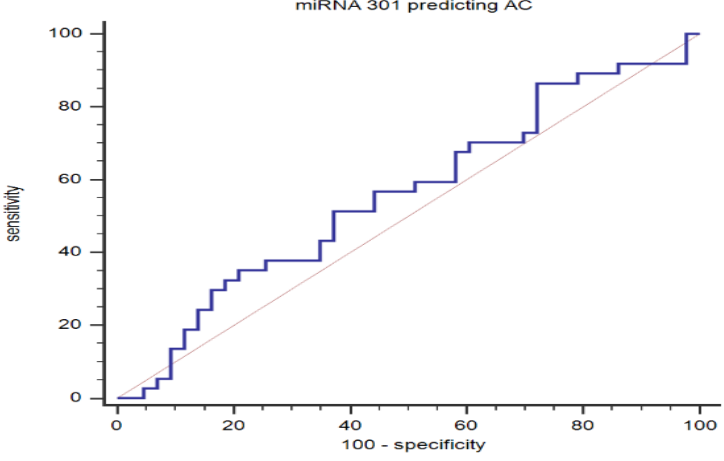   | <p>cutoff value: <math>\leq 0.00008</math></p> <p>AUC = 0.559</p> <p>P = 0.3689</p> <p>sensitivity = 86.49</p> <p>specificity = 27.91</p> <p>95% CI = 0.443 - 0.670</p> <p>Youden J = 0.1439</p>  |
| AR |   | <p>cutoff value: <math>&gt; 0.00005</math></p> <p>AUC = 0.541</p> <p>P = 0.6072</p> <p>sensitivity = 60.00</p> <p>specificity = 55.00</p> <p>95% CI = 0.426 - 0.653</p> <p>Youden J = 0.1500</p>  |
| RH |  | <p>cutoff value: <math>&gt; 0.00003</math></p> <p>AUC = 0.621</p> <p>P = 0.1066</p> <p>sensitivity = 100.00</p> <p>specificity = 29.41</p> <p>95% CI = 0.506 - 0.727</p> <p>Youden J = 0.2941</p> |

|      |                                                                                                                                                 |                                                                                                                                                                                                                                                                                                                                                                                                     |
|------|-------------------------------------------------------------------------------------------------------------------------------------------------|-----------------------------------------------------------------------------------------------------------------------------------------------------------------------------------------------------------------------------------------------------------------------------------------------------------------------------------------------------------------------------------------------------|
| FC   | <p data-bbox="497 129 730 152">miRNA 301 predicting FC</p> 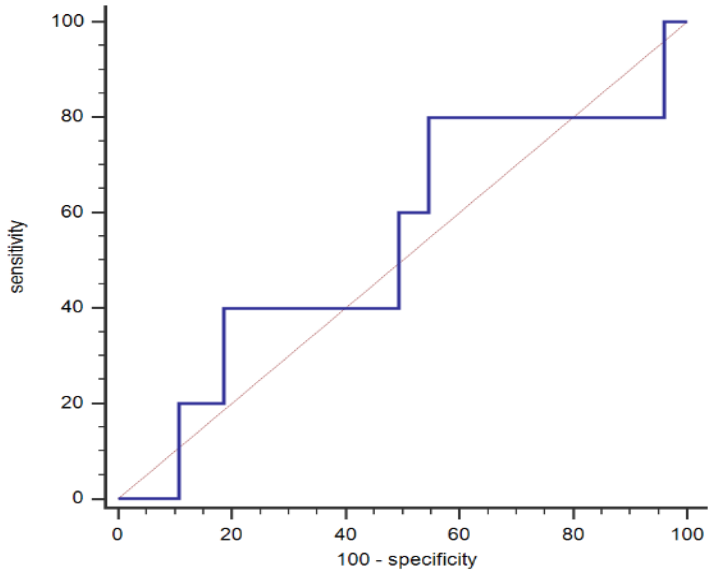    | <p data-bbox="986 107 1267 136">cutoff value: &gt; 0.00004</p> <p data-bbox="986 154 1139 183">AUC = 0.541</p> <p data-bbox="986 201 1117 230">P = 0.7897</p> <p data-bbox="986 248 1206 277">sensitivity = 80.00</p> <p data-bbox="986 295 1206 324">specificity = 45.33</p> <p data-bbox="986 342 1257 371">95% CI = 0.426 - 0.653</p> <p data-bbox="986 389 1206 418">Youden J = 0.2533</p>      |
| NSPC | <p data-bbox="481 862 746 884">miRNA 301 predicting NSPC</p>  | <p data-bbox="986 806 1275 835">cutoff value: &lt;=0.00004</p> <p data-bbox="986 853 1139 882">AUC = 0.658</p> <p data-bbox="986 900 1117 929">P = 0.1978</p> <p data-bbox="986 947 1206 976">sensitivity = 83.33</p> <p data-bbox="986 994 1206 1023">specificity = 68.92</p> <p data-bbox="986 1041 1257 1070">95% CI = 0.543 - 0.760</p> <p data-bbox="986 1088 1206 1117">Youden J = 0.5225</p> |

## miRNA -133a

|    |                                                                                     |                                                                                                                                                                                     |
|----|-------------------------------------------------------------------------------------|-------------------------------------------------------------------------------------------------------------------------------------------------------------------------------------|
| AC | 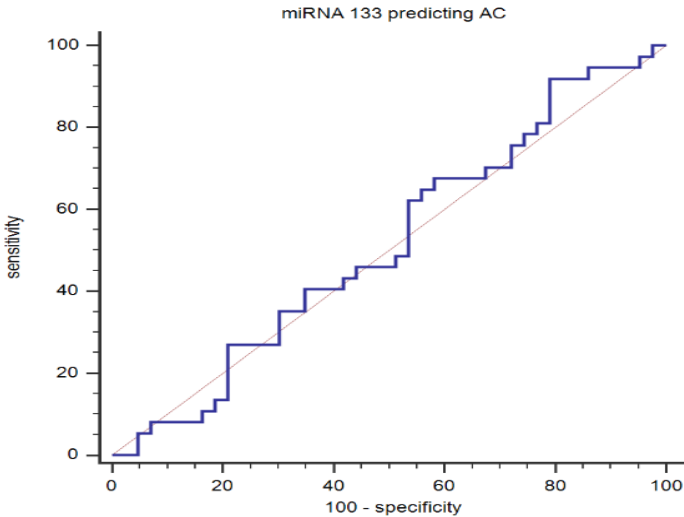   | <p>cutoff value: &gt;0.0007</p> <p>AUC = 0.515</p> <p>P = 0.8140</p> <p>sensitivity = 91.89</p> <p>specificity = 20.93</p> <p>95% CI = 0.401 - 0.629</p> <p>Youden J = 0.1282</p>   |
| AR |   | <p>cutoff value: &gt;0.0017</p> <p>AUC = 0.508</p> <p>P = 0.9196</p> <p>sensitivity = 60.00</p> <p>specificity = 56.67</p> <p>95% CI = 0.393 - 0.621</p> <p>Youden J = 0.1667</p>   |
| RH |  | <p>cutoff value: &lt;=0.0007</p> <p>AUC = 0.582</p> <p>P = 0.4099</p> <p>sensitivity = 33.33</p> <p>specificity = 88.24*</p> <p>95% CI = 0.466 - 0.691</p> <p>Youden J = 0.2157</p> |

|             |                                                                                                                  |                                                                                                                                                                  |
|-------------|------------------------------------------------------------------------------------------------------------------|------------------------------------------------------------------------------------------------------------------------------------------------------------------|
| <b>FC</b>   | <p>miRNA 133 predicting FC</p> 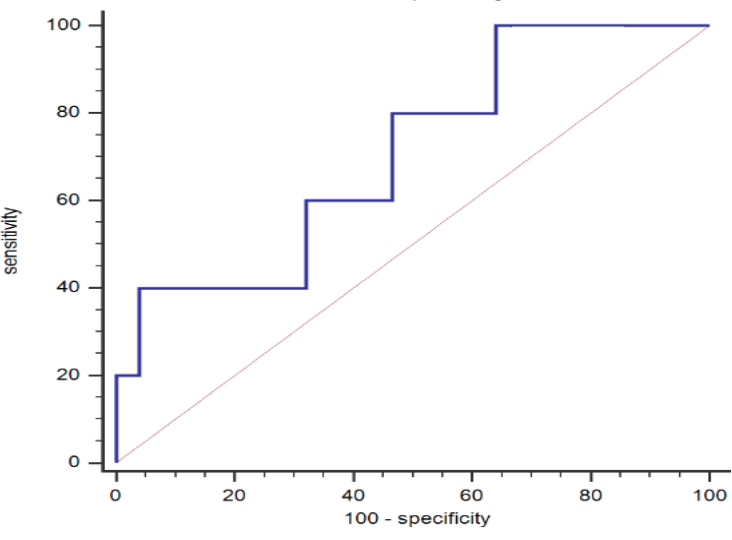 | <p>cutoff value: &gt;0.00011<br/>AUC = 0.707<br/>P = 0.1024<br/>sensitivity = 100.0<br/>specificity = 36.0<br/>95% CI = 0.594 - 0.803<br/>Youden J = 0.3600</p>  |
| <b>NSPC</b> | <p>miRNA predicting NSPC</p>   | <p>cutoff value: &lt;=0.0012<br/>AUC = 0.599<br/>P = 0.4975<br/>sensitivity = 66.67<br/>specificity = 64.86<br/>95% CI = 0.483 - 0.707<br/>Youden J = 0.3153</p> |

## miRNA -21

|    |                                                                                     |                                                                                                                                                                                   |
|----|-------------------------------------------------------------------------------------|-----------------------------------------------------------------------------------------------------------------------------------------------------------------------------------|
| AC | 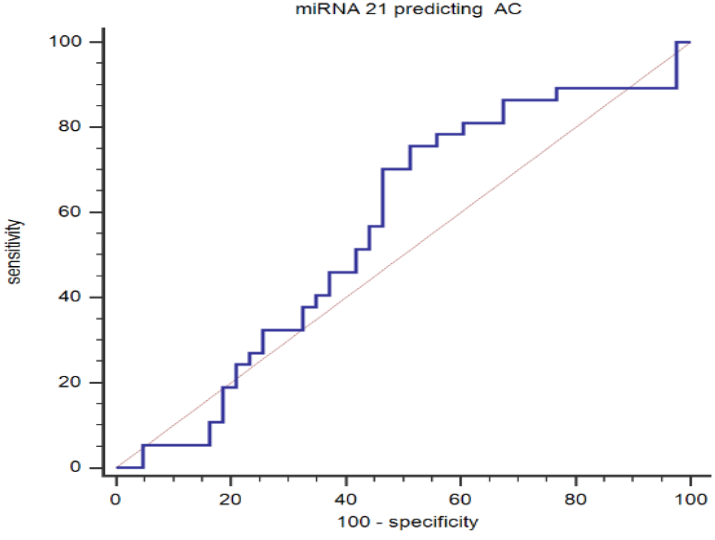   | <p>cutoff value: &gt; 1.4337</p> <p>AUC = 0.638</p> <p>P = 0.0652</p> <p>sensitivity = 60.0</p> <p>specificity = 70.0</p> <p>95% CI = 0.523 - 0.743</p> <p>Youden J = 0.3000</p>  |
| AR |   | <p>cutoff value: &gt;0.0007</p> <p>AUC = 0.533</p> <p>P = 0.0777</p> <p>sensitivity = 50.0</p> <p>specificity = 66.67</p> <p>95% CI = 0.418 - 0.646</p> <p>Youden J = 0.1667</p>  |
| RH |  | <p>cutoff value: &gt;0.0014</p> <p>AUC = 0.599</p> <p>P = 0.3542</p> <p>sensitivity = 58.33</p> <p>specificity = 73.53</p> <p>95% CI = 0.484 - 0.707</p> <p>Youden J = 0.3186</p> |

|      |                                                                                                                                                |                                                                                                                                                                                                                                                                                                                                                                                                                  |
|------|------------------------------------------------------------------------------------------------------------------------------------------------|------------------------------------------------------------------------------------------------------------------------------------------------------------------------------------------------------------------------------------------------------------------------------------------------------------------------------------------------------------------------------------------------------------------|
| FC   | <p data-bbox="502 123 742 152">miRNA21 predicting FC</p> 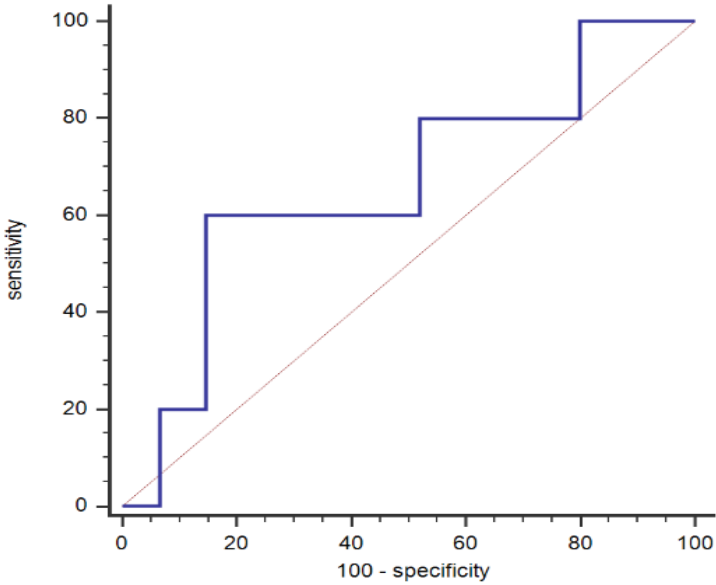     | <p data-bbox="973 107 1324 136">cutoff value: <math>\leq 0.000425745</math></p> <p data-bbox="973 154 1125 183">AUC = 0.664</p> <p data-bbox="973 201 1101 230">P = 0.2543</p> <p data-bbox="973 248 1197 277">sensitivity = 60.00</p> <p data-bbox="973 295 1197 324">specificity = 85.33</p> <p data-bbox="973 342 1244 371">95% CI = 0.550 - 0.766</p> <p data-bbox="973 389 1197 418">Youden J = 0.4533</p>  |
| NSPC | <p data-bbox="486 822 726 851">miRNA 21 predicting NSPC</p>  | <p data-bbox="973 806 1252 835">cutoff value: <math>\leq 0.0008</math></p> <p data-bbox="973 853 1125 882">AUC = 0.682</p> <p data-bbox="973 900 1117 929">P = 0.0225*</p> <p data-bbox="973 947 1197 976">sensitivity = 83.33</p> <p data-bbox="973 994 1197 1023">specificity = 62.16</p> <p data-bbox="973 1041 1236 1070">95% CI = 0.569 - 0.782</p> <p data-bbox="973 1088 1197 1117">Youden J = 0.4550</p> |
